# Supplementary material for: Clinical Evaluation Of Protein-Sieving Coefficient In Severe Nephrotic Syndrome
Source: Research Square preprint supplement (doi:10.21203/rs.3.rs-1325708/v1), 2022-03-08
Supplement: Supplementary file 1 [file d32dcb152caeb26912ab67ff.xlsx]

## Sheet: sTP<5 all
No.	sTP（g/dL)	sCr (mg/dL)	uTP (mg/dL)	uCr (mg/dL)	SCTP	uTP/Cr	24hrUPT（g/day)	24hrUPT/BSA（g/day/m2)	Urine storage（ml/day)	Height(ｃｍ）	Weight（ｋｇ）	BSA	Age	Sex	eGFR
1	3.5	0.39	5410.6	191.8	0.314335	28.2096	9.2	8.24851	170	131.8	34.6	1.11535	9	F	115.906
2	4.1	0.3	522.4	86.36	0.0442617	6.0491	2.79	2.5065	534	129.9	35.3	1.11311	10	F	147.132
3	3.7	0.29	2853.9	43.42	0.515164	65.7278	16.24	23.7947	569	100.5	17.3	0.682506	4	M	115.267
4	3.6	0.51	2610	273.65	0.135118	9.53773	5.79	3.72834	222	158.9	54.8	1.55297	12	F	122.882
5	4.2	0.56	2235.8	207.05	0.143978	10.7984	6.04	5.35608	270	134.5	34.3	1.12769	9	M	86.2158
6	3.8	0.55	1601	112.77	0.205483	14.197	5.3	4.2108	331	136.9	43.1	1.25867	9	M	90.2472
7	4.3	0.4	1412.5	166.53	0.0789019	8.48196	5.35	3.80861	379	154.4	45.45	1.40471	13	F	147.733
8	4.3	0.58	1310.3	62.35	0.283461	21.0152	19.46	13.4091	1485	170.1	41.6	1.45125	14	M	136
9	4.5	0.39	1155	125.98	0.0794571	9.16812	6.87	4.88384	595	154.4	45.6	1.40668	13	F	151.446
10	3.4	0.87	1092	153.35	0.182213	7.12097	7.01	4.13256	642	158.9	67.45	1.69628	20	M	95.6251
11	4.2	0.51	1025.9	66.33	0.187809	15.4666	8.06	6.44185	786	136.9	42.5	1.25119	9	M	97.0956
12	4.6	0.43	1011.3	81.34	0.116221	12.433	5.33	5.91153	527	121.2	24.2	0.901628	7	M	96.5962
13	4.9	0.59	1008.4	157.54	0.0770722	6.40091	5.32	3.60159	528	156.3	50.1	1.47713	15	M	109.391
14	4.2	0.58	975	22.29	0.604051	43.7416	25.27	13.3028	2592	170.2	78.3	1.89959	16	M	136.194
15	4.9	0.33	907.9	56.09	0.109011	16.1865	4.03	5.47804	444	105.2	19.091	0.735665	4	F	109.516
16	4.9	0.47	835.1	55.82	0.1435	14.9606	7.97	5.03852	954	153.8	60.5	1.58182	14	F	125.229
17	4.5	0.46	734.5	100.17	0.0749548	7.33253	2.88	2.07668	392	154.4	44.1	1.38683	13	F	128.845
18	3.8	0.46	720.5	31.24	0.279188	23.0634	6.43	6.56425	892	129.7	26.2	0.979548	7	F	96.7985
19	4.8	0.44	552.3	58.54	0.0864836	9.43457	4.53	4.72167	821	129.7	24.95	0.959407	9	F	101.065
20	4.1	0.3	522.4	86.36	0.0442617	6.0491	2.79	2.5065	534	129.9	35.3	1.11311	10	F	147.132
21	4.1	0.44	514.2	73.22	0.0753653	7.02267	4.6	2.96651	894	154.4	57.35	1.55064	17	F	134.569
22	4.8	0.34	511.8	35.26	0.102815	14.515	4.42	6.05574	864	105.2	18.74	0.729886	4	F	106.381
23	4.3	0.39	482.7	39.89	0.109751	12.1008	4.26	4.29291	883	130.3	26.8	0.992335	8	F	114.275
24	4.4	0.55	416.8	101.33	0.0514162	4.11329	3	1.62487	720	158.6	82.6	1.8463	12	M	121.134
25	4.8	0.31	416.6	48.45	0.0555323	8.59856	2.71	3.69123	651	105.2	19	0.734172	4	F	116.392
26	4.3	0.39	399.4	32.68	0.110847	12.2215	5.69	7.57807	1425	112.7	17.811	0.750851	5	F	99.2695
27	4.8	0.35	0.044	27.8	0.0115408	1.58273	0.69	0.909091	1258	111.6	18.6	0.759	6	M	107.41
28	4.8	0.31	0.095	35.6	0.017234	2.66854	1.12	1.16545	1135	127.1	25.9	0.961	6	M	141.2
29	3.5	0.27	0.109	42.1	0.019973	2.58907	0.86	1.24098	276	104	16.9	0.693	4	M	128.22
30	4.5	0.26	0.222	63.1	0.020328	3.51823	1.22	1.8209	726	102.6	16	0.67	3	F	134.68
31	4	0.75	0.139	111	0.02348	1.25225	4.45	2.40801	1971	168	75	1.848	20	M	112.5
32	4.9	0.36	0.077	24	0.023571	3.20833	2.8	2.91363	1999	127.1	25.9	0.961	6	M	121.99
33	4.9	0.4	0.067	22.6	0.024201	2.9646	1.1	1.4531	813	111.3	18.55	0.757	6	M	94.08
34	4.4	0.45	0.095	34.1	0.028492	2.78592	0.84	0.939597	686	125.5	22.35	0.894	7	M	96.55
35	4.4	0.73	0.154	82.5	0.0309697	1.86667	0.58	0.715166	146	110.5	22.1	0.811	5	M	52.47
36	4.9	1.25	0.745	600.7	0.031638	1.24022	1.53	1.19159	87	147	40	1.284	14	F	45.02
37	4.9	0.41	0.138	35.1	0.032897	3.93162	1.53	1.71141	952	125.5	22.35	0.894	7	M	105.69
38	4.1	0.31	0.095	21.7	0.033101	4.37788	1.39	1.83136	1136	111.6	18.6	0.759	6	M	120.89
39	4.4	1.5	0.034	34.3	0.033793	0.991254	1.56	1.08863	1287	168.4	41.1	1.433	15	M	53.12
40	4.7	0.37	0.122	28.2	0.034058	4.32624	1.77	1.84183	869	127.1	25.9	0.961	6	M	118.78
41	4.3	0.4	0.103	23.2	0.041299	4.43966	1.59	2.1004	1291	111.3	18.55	0.757	6	M	94.08
42	4.5	0.36	0.493	81.5	0.048393	6.04908	3.81	4.26174	1226	125.5	22.35	0.894	7	M	119.96
43	4.4	0.5	0.302	69.9	0.049096	4.32046	2.03	2.11238	594	127.1	25.9	0.961	6	M	88.66
44	4.3	0.34	0.922	146.1	0.049899	6.31075	0.85	1.26866	218	102.6	16	0.67	3	F	103.68
45	4.6	0.67	0.79	188	0.0612049	4.20213	8.79	5.88353	1526	158.1	50.5	1.494	19	M	129.1
46	4.9	0.44	0.333	47.7	0.062688	6.98113	2.84	2.95525	585	127.1	25.9	0.961	6	M	100.35
47	3.7	0.6	0.675	165.6	0.066099	4.07609	4.3	3.0007	591	168.4	41.1	1.433	15	M	128.4
48	3.5	0.53	0.473	107.7	0.066505	4.39183	3.38	2.35869	551	168.4	41.1	1.433	15	M	144.8
49	3.7	0.47	0.634	107	0.0752665	5.92523	3.7	3.55086	531	138.8	27	1.042	15	M	107.57
50	4	0.39	0.167	20.2	0.080606	8.26733	4.14	5.46896	2203	111.3	18.55	0.757	6	M	96.41
51	4.2	0.41	0.865	100.8	0.0837703	8.58135	4.32	4.30279	1093	131.3	27.2	1.004	7	M	112.5
52	4.2	0.4	0.177	17	0.09916	10.4118	2.69	3.5535	1286	111.3	18.55	0.757	6	M	94.08
53	4.1	0.31	0.33	25.1	0.099407	13.1474	5.4	7.13342	834	111.3	18.55	0.757	6	M	120.54
54	4.3	0.41	0.23	21	0.10443	10.9524	3.24	4.28005	1373	111.3	18.55	0.757	6	M	91.85
55	5	0.68	0.46	58.9	0.106214	7.80985	4.7	3.90041	2054	147.7	34.15	1.205	13	M	84.43
56	4.1	0.38	0.324	24.8	0.121086	13.0645	5.4	7.13342	969	111.3	18.55	0.757	6	M	98.87
57	4	0.35	2.016	110.7	0.15935	18.2114	6.11	7.02299	1134	122	22	0.87	7	M	118.96
58	3.6	0.35	0.787	46.8	0.163491	16.8162	6.14	6.07921	1700	125	30	1.01	7	M	122.66
59	3.6	0.66	1.573	145	0.198885	10.8483	6.28	5.79871	537	143.2	28	1.083	15	M	81.86
60	4.5	1.52	0.436	56.9	0.258824	7.66257	5.56	4.8559	842	141.2	32.75	1.145	11	F	35.09
61	4.9	1.61	0.673	64.1	0.344974	10.4992	7.74	6.75983	850	141.2	32.75	1.145	11	F	33.3
62	3.9	0.9	2.635	154.4	0.393832	17.0661	31.25	16.9102	1547	168	75	1.848	20	M	92.1
63	5	1.8	2.855	219.9	0.467394	12.9832	21.24	18.5502	1808	141.2	32.75	1.145	11	F	30.09

## Sheet: analysis
SCTP (%)	uTP/Cr (g/g Cr)	24hrUTP（g/day)	24hrUPT/BSA (g/day/m2)	BSA
0.019973	2.58907	0.86	1.24098	0.693
0.017234	2.66854	1.12	1.16545	0.961
0.028492	2.78592	0.84	0.939597	0.894
0.024201	2.9646	1.1	1.4531	0.757
0.023571	3.20833	2.8	2.91363	0.961
0.020328	3.51823	1.22	1.8209	0.67
0.032897	3.93162	1.53	1.71141	0.894
0.066099	4.07609	4.3	3.0007	1.433
0.0514162	4.11329	3	1.62487	1.8463
0.0612049	4.20213	8.79	5.88353	1.494
0.049096	4.32046	2.03	2.11238	0.961
0.034058	4.32624	1.77	1.84183	0.961
0.033101	4.37788	1.39	1.83136	0.759
0.066505	4.39183	3.38	2.35869	1.433
0.041299	4.43966	1.59	2.1004	0.757
0.0752665	5.92523	3.7	3.55086	1.042
0.048393	6.04908	3.81	4.26174	0.894
0.0442617	6.0491	2.79	2.5065	1.11311
0.0442617	6.0491	2.79	2.5065	1.11311
0.049899	6.31075	0.85	1.26866	0.67
0.0770722	6.40091	5.32	3.60159	1.47713
0.062688	6.98113	2.84	2.95525	0.961
0.0753653	7.02267	4.6	2.96651	1.55064
0.182213	7.12097	7.01	4.13256	1.69628
0.0749548	7.33253	2.88	2.07668	1.38683
0.258824	7.66257	5.56	4.8559	1.145
0.106214	7.80985	4.7	3.90041	1.205
0.080606	8.26733	4.14	5.46896	0.757
0.0789019	8.48196	5.35	3.80861	1.40471
0.0837703	8.58135	4.32	4.30279	1.004
0.0555323	8.59856	2.71	3.69123	0.734172
0.0794571	9.16812	6.87	4.88384	1.40668
0.0864836	9.43457	4.53	4.72167	0.959407
0.135118	9.53773	5.79	3.72834	1.55297
0.09916	10.4118	2.69	3.5535	0.757
0.344974	10.4992	7.74	6.75983	1.145
0.143978	10.7984	6.04	5.35608	1.12769
0.198885	10.8483	6.28	5.79871	1.083
0.10443	10.9524	3.24	4.28005	0.757
0.109751	12.1008	4.26	4.29291	0.992335
0.110847	12.2215	5.69	7.57807	0.750851
0.116221	12.433	5.33	5.91153	0.901628
0.467394	12.9832	21.24	18.5502	1.145
0.121086	13.0645	5.4	7.13342	0.757
0.099407	13.1474	5.4	7.13342	0.757
0.205483	14.197	5.3	4.2108	1.25867
0.102815	14.515	4.42	6.05574	0.729886
0.1435	14.9606	7.97	5.03852	1.58182
0.187809	15.4666	8.06	6.44185	1.25119
0.109011	16.1865	4.03	5.47804	0.735665
0.163491	16.8162	6.14	6.07921	1.01
0.393832	17.0661	31.25	16.9102	1.848
0.15935	18.2114	6.11	7.02299	0.87
0.283461	21.0152	19.46	13.4091	1.45125
0.279188	23.0634	6.43	6.56425	0.979548
0.314335	28.2096	9.2	8.24851	1.11535
0.604051	43.7416	25.27	13.3028	1.89959
0.515164	65.7278	16.24	23.7947	0.682506
Mean	10.9885	5.85293	5.174
SE	1.33509	0.765036	0.566477
